# Supplementary material for: Toxoplasma gondii F-actin forms an extensive filamentous network required for material exchange and parasite maturation
Source: eLife. 2017 Mar 21;6:e24119. doi: 10.7554/eLife.24119 (PMC5375643; doi:10.7554/eLife.24119)
Supplement: Figure 1—source data 1. — DOI: http://dx.doi.org/10.7554/eLife.24119.004 [file elife-24119-fig1-data1.xlsx]

## Sheet: Fig.1A
Replica1
		act1KO							LoxPact1KO
		CS1	CS2	CS3	Average	StdDev			CS1	CS2	CS3	Average	StdDev
	2	15	15	13	14.3333	1.1547		2	16	15	19	16.6667	2.08167
	4	29	42	37	36	6.55744		4	43	41	33	39	5.2915
	8	13	17	14	14.6667	2.08167		8	28	27	25	26.6667	1.52753
	>16	3	2	3	2.66667	0.57735		>16	5	10	13	9.33333	4.04145
	Odd	40	24	33	32.3333	8.02081		Odd	8	7	10	8.33333	1.52753
	Total counted	100	100	100				Total counted	100	100	100
	Sync%	60	76	67				Sync%	91	93	90
	Async%	40	24	33				Async%	9	7	10
Replica2		act1KO							LoxPact1KO
		CS1	CS2	CS3	Average	StdDev			CS1	CS2	CS3	Average	StdDev
	2	17	17	20	18	1.73205		2	23	28	21	24	3.60555
	4	34	30	29	31	2.64575		4	39	39	40	39.3333	0.57735
	8	6	9	5	6.66667	2.08167		8	23	14	22	19.6667	4.93288
	>16	2	1	3	2	1		>16	7	8	7	7.33333	0.57735
	Odd	41	43	43	42.3333	1.1547		Odd	8	11	10	9.66667	1.52753
	Total counted	100	100	100				Total counted	100	100	100
	Sync%	59	57	57				Sync%	92	89	90
	Async%	41	43	43				Async%	8	11	10
Replica3		act1KO							LoxPact1KO
		CS1	CS2	CS3	Average	StdDev			CS1	CS2	CS3	Average	StdDev
	2	21	19	23	21	2		2	12	18	24	18	6
	4	35	39	38	37.3333	2.08167		4	55	41	43	46.3333	7.57188
	8	7	9	7	7.66667	1.1547		8	19	34	22	25	7.93725
	>16	1	1	2	1.33333	0.57735		>16	8	1	5	4.66667	3.51188
	Odd	36	32	30	32.6667	3.05505		Odd	6	6	6	6	0
	Total counted	100	100	100				Total counted	100	100	100
	Sync%	64	68	70				Sync%	94	94	94
	Async%	36	32	30				Async%	6	6	6
Total results
		act1KO							LoxPact1KO
		Replica1	Replica2	Replica3	Average	StdDev			Replica1	Replica2	Replica3	Average	StdDev
	2	14.3333	18	21	17.7778	3.33888		2	16.6667	24	18	19.5556	3.90631
	4	36	31	37.3333	34.7778	3.33888		4	39	39.3333	46.3333	41.5556	4.14103
	8	14.6667	6.66667	7.66667	9.66667	4.3589		8	26.6667	19.6667	25	23.7778	3.65655
	>16	2.66667	2	1.33333	2	0.666667		>16	9.33333	7.33333	4.66667	7.11111	2.34126
	Odd	32.3333	42.3333	32.6667	35.7778	5.67972		Odd	8.33333	9.66667	6	8	1.85592
	Total	100	100	100				Total	100	100	100
	Sync%	67.6667	57.6667	67.3333				Sync%	91.6667	90.3333	94
	Async%	32.3333	42.3333	32.6667				Async%	8.33333	9.66667	6
