# Supplementary material for: Toxoplasma gondii F-actin forms an extensive filamentous network required for material exchange and parasite maturation
Source: eLife. 2017 Mar 21;6:e24119. doi: 10.7554/eLife.24119 (PMC5375643; doi:10.7554/eLife.24119)
Supplement: Figure 4—source data 1. — DOI: http://dx.doi.org/10.7554/eLife.24119.012 [file elife-24119-fig4-data1.xlsx]

## Sheet: Gliding
	RH	RH-Chromobody-HALO				Finalised results
2016-03-08							Percentage Invasion (%)				Average Std Dev
CS1	123	152					RH	RH-Chromobody-HALO			RH	RH-Chromobody-HALO
CS2	111	136				Assay 1	100	115.1			8.48528	18.037
CS3		116				Assay 2	100	137.107			7.93725	17.1561
Average	117	134.667				Assay 3	100	178.632			16	8.88819
Percentage	100	115.1				Average	100	143.613			10.8075	14.6938
Std Dev	8.48528	18.037								Std error	6.23972	8.48346
2016-03-09
CS1	62	91
CS2	50	57
CS3	47	70
Average	53	72.6667
Percentage	100	137.107
Std Dev	7.93725	17.1561
2016-03-21
CS1	133	199
CS2	117	216
CS3	101	212
Average	117	209
Percentage	100	178.632
Std Dev	16	8.88819

## Sheet: Invasion
	RH	RH-Chromobody-HALO				Finalised results
2016-03-08							Percentage Invasion (%)				Average Std Dev
CS1	231	236					RH	RH-Chromobody-HALO			RH	RH-Chromobody-HALO
CS2	224	174				Assay 1	100	94.9695			15.695	31.3422
CS3	201	213				Assay 2	100	92.4051			13.435	6.36396
Average	218.667	207.667				Assay 3	100	86.2986			38.5746	26.5016
Percentage	100	94.9695				Average	100	91.2244			22.5682	21.4026
Std Dev	15.695	31.3422								Std error	13.0298	12.3568
2016-03-09
CS1		178
CS2	188	187
CS3	207
Average	197.5	182.5
Percentage	100	92.4051
Std Dev	13.435	6.36396
2016-03-22
CS1	135	162
CS2	207	111
CS3	147	149
Average	163	140.667
Percentage	100	86.2986
Std Dev	38.5746	26.5016

## Sheet: Replication
raw numbers																Finalised results
		Parasites/ vacuole							Parasites/ vacuole								Parasites/ vacuole							Parasites/ vacuole
Assay 1 (08.03.2016)	RH	2	4	8	16	32+		RH-ChrB-HALO	2	4	8	16	32+			RH	2	4	8	16	32+		RH-ChrB-HALO	2	4	8	16	32+
	CS1	15	15	28	133	9	200	CS1	27	33	37	95	8			Assay 1	11	12.6667	28.3333	140	8	200	Assay 1	20.3333	22.6667	39.3333	112	5.66667
	CS2	8	10	29	145	8	200	CS2	22	21	38	116	3			Assay 2	12	12.5	30	138	7.5	200	Assay 2	14	24	37.5	119.5	5
	CS3	10	13	28	142	7	200	CS3	12	14	43	125	6			Assay 3	12.6667	24.6667	44.3333	111.333	7	200	Assay 3	17.6667	26.3333	45.3333	106	4.66667
	Average	11	12.6667	28.3333	140	8	200	Average	20.3333	22.6667	39.3333	112	5.66667			Average	11.8889	16.6111	34.2222	129.778	7.5	200	Average	17.3333	24.3333	40.7222	112.5	5.11111
	Std Dev	3.60555	2.51661	0.57735	6.245	1	13.9445	Std Dev	7.63763	9.60902	3.21455	15.3948	2.51661			Percentage (%)	5.94444	8.30556	17.1111	64.8889	3.75	100	Percentage (%)	8.66667	12.1667	20.3611	56.25	2.55556	100
Assay 2 (09.03.2016)	RH	2	4	8	16	32+		RH-ChrB-HALO	2	4	8	16	32+
	CS1							CS1	16	24	40	115	5
	CS2	14	14	31	133	8		CS2	12	24	35	124	5
	CS3	10	11	29	143	7		CS3
	Average	12	12.5	30	138	7.5		Average	14	24	37.5	119.5	5
	Std Dev	2.82843	2.12132	1.41421	7.07107	0.707107		Std Dev	2.82843	0	3.53553	6.36396	0
Assay 3 (23.03.2016)	RH	2	4	8	16	32+		RH-ChrB-HALO	2	4	8	16	32+
	CS1	5	30	57	100	8		CS1	14	24	42	114	6			Finalised Std Dev
	CS2	13	25	36	119	7		CS2	12	24	49	109	6			RH	2	4	8	16	32+		RH-ChrB-HALO	2	4	8	16	32+
	CS3	20	19	40	115	6		CS3	27	31	45	95	2			Assay 1	3.60555	2.51661	0.57735	6.245	1		Assay 1	7.63763	9.60902	3.21455	15.3948	2.51661
	Average	12.6667	24.6667	44.3333	111.333	7		Average	17.6667	26.3333	45.3333	106	4.66667			Assay 2	2.82843	2.12132	1.41421	7.07107	0.707107		Assay 2	2.82843	0	3.53553	6.36396	0
	Std Dev	7.50555	5.50757	11.1505	10.0167	1		Std Dev	8.14453	4.04145	3.51188	9.84886	2.3094			Assay 3	7.50555	5.50757	11.1505	10.0167	1		Assay 3	8.14453	4.04145	3.51188	9.84886	2.3094
																Average	4.64651	3.38183	4.38068	7.77757	0.902369		Average	6.20353	4.55016	3.42066	10.5359	1.60867
																Std Error	2.68266	1.9525	2.52919	4.49038	0.520983		Std Error	3.58161	2.62704	1.97492	6.08289	0.928767

## Sheet: Egress
2016-03-20	RH	RH-Chromoody		2016-03-26	RH	RH-Chromoody			RH	RH-Chromoody
CS1	150			CS1	149	189		CS1	162	162
CS2	185	183		CS2	187	177		CS2	163	165
CS3	181	171		CS3	187	175		CS3	188	179
Average	172	177		Average	174.333	180.333		Average	171	168.667
Percentage	86	88.5		Percentage	87.1667	90.1667		Percentage	85.5	84.3333
Std Dev	19.1572	8.48528		Std Dev	21.9393	7.57188		Std Dev	14.7309	9.07377
	Egress Percentage final
	RH	RH-Chromoody
Assay 1	86	88.5
Assay 2	87.1667	90.1667
Assay 3	85.5	84.3333
Average	86.2222	87.6667
	Std Dev
Assay 1	19.1572	8.48528
Assay 2	21.9393	7.57188
Assay 3	14.7309	9.07377
Average	18.6092	8.37698
Std Error	10.744	4.83645

## Sheet: Plaque Assay
	RH					RH Chromobody-HALO Clone 1					RH Chromobody-HALO Clone 2					RH Chromobody-HALO Clone 10					RH Chromobody-HALO Clone 15					RH Chromobody-HALO Clone 16					RH	RH Chromobody-HALO Clone 1	RH Chromobody-HALO Clone 2	RH Chromobody-HALO Clone 10	RH Chromobody-HALO Clone 15	RH Chromobody-HALO Clone 16
	Assay1	Assay2	Assay3			Assay1	Assay2	Assay3			Assay1	Assay2	Assay3			Assay1	Assay2	Assay3			Assay1	Assay2	Assay3			Assay1	Assay2	Assay3		Assay1	1.8255	1.535	1.074	1.0649	0.8069	1.0692
1	2.091	2.153	4.093		1	0.862	0.875	2.126		1	1.642	1.093	3.426		1	1.227	0.745	2.132		1	0.742	1.191	3.802		1	0.612	0.855	3.318		Assay2	1.4839	1.1065	0.979	1.067	0.6893	1.0272
2	2.92	1.686	4.804		2	1.13	1.737	2.634		2	0.875	0.51	2.508		2	0.665	0.973	2.603		2	0.327	0.376	3.532		2	1.595	0.185	2.294		Assay3	2.9107	2.9499	3.0044	2.4394	2.6889	2.7242
3	1.815	0.99	3.268		3	0.868	0.952	3.031		3	1.16	1.512	4.625		3	1.401	1.156	2.296		3	0.895	1.563	2.782		3	0.962	0.37	2.673		average	2.07337	1.8638	1.6858	1.52377	1.39503	1.60687
4	2.049	1.431	3.068		4	1.336	1.909	3.157		4	0.824	1.461	3.143		4	1.166	1.232	1.203		4	1.254	0.529	1.547		4	0.916	1.22	3.099
5	1.289	1.938	1.007		5	2.14	0.723	2.119		5	1.099	0.681	2.768		5	1.245	0.804	2.701		5	0.761	0.281	1.622		5	1.197	0.352	2.293
6	1.837	1.509	4.685		6	1.713	0.921	4.228		6	1.051	1.22	3.251		6	0.584	1.24	2.902		6	0.671	0.454	3.484		6	1.017	1.074	2.322		Assay1	0.585631	0.488087	0.300251	0.294619	0.237805	0.269539
7	1.28	1.164	2.342		7	1.994	0.916	3.225		7	1.451	1.051	1.831		7	1.392	1.653	2.562		7	0.732	0.616	2.673		7	1.237	1.238	2.622		Assay2	0.372891	0.40977	0.359727	0.294113	0.424893	0.591615
8	1.568	1.148	2.063		8	1.382	0.782	3.306		8	0.908	0.947	3.119		8	0.753	0.789	2.373		8	0.923	0.387	2.036		8	1.055	2.047	3.448		Assay3	1.36236	0.615516	0.733238	0.500463	0.795635	0.458661
9	0.966	1.206	0.976		9	2.113	1.31	2.715		9	0.619	0.824	2.86		9	1.1	1.273	2.864		9	0.971	1.031	2.361		9	1.257	1.378	2.204		average	0.773626	0.504458	0.464405	0.363065	0.486111	0.439938
10	2.44	1.614	2.801		10	1.812	0.94	2.958		10	1.111	0.491	2.513		10	1.116	0.805	2.758		10	0.793	0.465	3.05		10	0.844	1.553	2.969		Std Error	0.446653	0.291249	0.268124	0.209616	0.280656	0.253999
average	1.8255	1.4839	2.9107			1.535	1.1065	2.9499			1.074	0.979	3.0044			1.0649	1.067	2.4394			0.8069	0.6893	2.6889			1.0692	1.0272	2.7242
std dev	0.585631	0.372891	1.36236			0.488087	0.40977	0.615516			0.300251	0.359727	0.733238			0.294619	0.294113	0.500463			0.237805	0.424893	0.795635			0.269539	0.591615	0.458661
																														t test		p value
																														RH	clone1	0.714351	Statistical significance determined using the Holm-Sidak method, with alpha=5.000%.
																														RH	clone2	0.498227
																														RH	clone10	0.327732
																														RH	clone15	0.267864
																														RH	clone16	0.415282
																																	Each row was analyzed individually, without assuming a consistent SD.

## Sheet: 2D motility
	Average Distance						Average speed
	helical		circular				helical		circular
	RH-H	RH-CB-Halo	RH-C	RH-CB-Halo			RH	CB-H	RH	CB-Halo
1	12.8551	98.2957	6.14297	9.77472			0.803443	0.52832	0.438783	0.42496
2	16.8671	27.0621	11.2203	55.04			0.992184	0.42944	0.748017	0.3968
3	28.1315	35.8422	11.2703	49.0752			0.879108	0.59744	0.751353	0.70112
4	102.912	13.6771	11.9552	39.1802			1.06857	0.44128	0.853945	0.496
5	19.2342	67.4758	12.1414	148.48			0.8934	0.66816	0.674523	0.47192
6	16.9746	44.9622	12.2215	50.4374			0.984784	0.5552	0.721078	0.53088
7	31.5131	19.0986	12.2583	53.0902			1.43799	0.3472	0.907192	0.6432
8	134.078	7.984	12.7161	50.4378			1.29933	0.2048	0.580131	0.40352
9	105.246	23.3101	18.1439	204.5			1.2703	0.42368	0.999372	0.46688
10	15.2436	33.5018	18.2772	32.1619			1.75054	0.98528	1.00566	0.40288
11	63.0194	48.112	20.8847	42.7616			1.45541	0.39776	0.825454	0.42656
12	50.9392	59.1158	22.5928	66.7638			1.36187	0.6288	0.827773	0.54112
13	91.2452	36.2755	22.9855	66.7616			0.95266	0.75584	0.857773	0.58784
14	20.0059	42.0925	25.1414	58.0374			2.13799	0.60992	0.754443	1.02144
15	78.0356	23.5786	26.4145	70.6422			1.08852	0.94304	0.686594	0.47744
16	21.3799	49.9315	26.4887	47.0758			1.19847	0.76832	1.43162	0.42496
17	34.8327	68.9114	27.4473	25.2736			1.79264	0.48192	0.770028	0.52704
18	50.3356	83.7021	30.9461	43.479			2.06763	0.44768	1.21743	0.26112
19	50.1938	61.3776	34.9074	42.9008			2.24328	0.26912	1.02388	0.3312
20	35.1498	68.1958	42.5688	47.7475			1.47091	0.4288	1.06972	0.66496
21	62.8118		61.5598	128.125
22	38.2436		63.1423	29.5171
23			77.9157	36.04
24			87.0296	27.4998
25			239.618	28.5942

## Sheet: Real-time invasion
parasite number	RH	RH-Chromobody-Halo
1	20	22
2	25	39
3	24	78
4	31	19
5	33	137
6	16	38
7	15	27
8	82	14
9	16	16
10	15	22
11	20	110
12	25	22
13	28	25
14	13	20
15	18	24
16	21	18
17	24	22
18	18	45
19	34	20
20	17	29
21	16	23
22	17	19
