# Supplementary material for: Toxoplasma gondii F-actin forms an extensive filamentous network required for material exchange and parasite maturation
Source: eLife. 2017 Mar 21;6:e24119. doi: 10.7554/eLife.24119 (PMC5375643; doi:10.7554/eLife.24119)
Supplement: Figure 6—source data 1. — DOI: http://dx.doi.org/10.7554/eLife.24119.016 [file elife-24119-fig6-data1.xlsx]

## Sheet: Fig6A
					JAS	Cyt_D	Control
Apparent filament size	JAS	Cyt-D	Control	Number of values	64	363	294
(pixels)	87.5	2.3	9.3
	47.8	4.1	3.1	Minimum Length (pixels)	0.8	0.2	0.9
	36.1	3.6	24.7	Maximum (length pixels)	145	66	112.6
	3.5	66	112.6
	13.2	8.6	44.7	Mean	20.54	9.937	16.62
	15	43.3	21.3	Std. Deviation	30.03	9.891	15.66
	13.2	5	24.7	Std. Error	3.753	0.5191	0.9131
	4.6	3.6	11.7
	8	41.3	4.1	Lower 95% CI of mean	13.04	8.916	14.83
	4.2	11.3	15.1	Upper 95% CI of mean	28.04	10.96	18.42
	2.9	9	57.5
	3.8	36.8	14.9	Sum	1314	3607	4887
	2	12.6	37.9
	24.1	3.1	7.9
	78.9	15.8	13.3
	16.2	4	19.9
	2.2	10.5	6.1
	1.1	2.3	21.4
	5.2	30.9	6.5
	1	19.3	1.9
	3	1.3	1
	1	2	34
	4.1	1	4.1
	1.2	15.1	31.1
	3.2	3	99.3
	1.8	25.3	21.1
	3.1	3.2	41.9
	4.2	11.2	19.7
	1.6	3.2	37.4
	1.9	2.3	22.8
	5.9	22.2	36.7
	2	10.7	11.7
	63.8	10	28.7
	1.7	27.6	11.3
	0.8	12	11
	38.9	3.3	7.9
	1.1	11.7	1
	1	36.5	4.9
	2.2	7.7	15
	1.9	0.9	42.3
	2	2.1	9.5
	109	2	17.4
	50.2	19.1	16.1
	49.9	29.4	10.1
	9.1	5.1	14.3
	5.2	1.6	32.9
	9.7	9	6.8
	145	13.2	29.3
	0.9	20.7	13
	39.4	3.9	13
	73.9	11.4	26.5
	1.6	15.6	34.8
	46.1	1	22.5
	1.7	10.1	12.5
	31.2	0.6	41.7
	24.9	5.1	20.2
	15.3	11.6	14.5
	27.1	1	25.2
	39.3	15.7	15.2
	1	16.4	6.6
	2	17.4	4.1
	1.4	26.5	20.4
	81.1	10.6	3.1
	32.5	7	22
		9.1	19.9
		6.1	14
		11.2	25.4
		8.4	48
		25.3	3.5
		11.8	34.2
		2.9	23.2
		3.3	20.6
		6.6	11.3
		10.1	29.4
		6.1	10.5
		8.4	10.1
		8.7	10.1
		2	9.1
		5.3	13.2
		7.3	5.5
		13.4	4.2
		0.5	2.1
		10.6	28.8
		17.8	1
		5.5	36.9
		10.4	1.1
		3.3	1
		0.8	7.1
		11.9	20.2
		11.1	15.1
		6.2	1.1
		3.5	45.8
		10.1	66.1
		13.1	44.7
		8.1	5.2
		8.1	20.5
		8.2	4.9
		4.3	20.1
		51.6	15.6
		17.2	19.5
		6.1	12.1
		20.5	35.3
		17.7	28.3
		2	2.7
		13.3	17.1
		8.3	12.3
		9.2	16.2
		3.5	23.2
		5.2	17.5
		8.3	2.9
		9.8	2.9
		8.7	13.8
		8.3	18.1
		2.1	27.5
		0.9	20
		2.2	18.8
		2.1	20
		46	9.5
		1.2	25.2
		23.1	93.6
		1.1	7.9
		3.7	9.6
		1.4	6.1
		3.9	18.5
		12.3	2.1
		12.8	32.5
		10	22.2
		3.4	5.4
		1.8	21.4
		17.2	34.7
		44.4	18.7
		4.2	26.3
		13.9	2.5
		12.8	20.4
		15	16.6
		55.2	5
		29.7	33.1
		14.3	12.3
		18.5	16
		31.3	6.7
		14.8	9
		13.1	13.5
		12.8	7.1
		11.1	24.7
		23.5	15.2
		1.9	23.5
		14.8	14.7
		12.9	6.5
		17.2	13.7
		4.8	8
		3.6	28.1
		3.4	50.4
		14.7	11.7
		9.8	27.5
		10.3	24.4
		18.4	11.5
		17.5	2.3
		8.5	22.6
		16.5	23.9
		12.7	18.7
		15	23.7
		8.6	5.7
		31.5	9
		13.5	26.9
		13.6	8
		5	26.7
		19.4	9.5
		16.6	14.4
		13	9.2
		7.5	0.9
		9.4	9
		31.3	4.2
		10.5	24.2
		12.9	3.4
		1.9	11.6
		32.1	9.3
		16.7	11.7
		13.6	37.7
		8.2	60.2
		18.1	56.6
		36.4	1.5
		8.7	64.4
		22.3	6
		27.4	0.9
		19	21.7
		11.6	2.1
		12.4	11.7
		27.9	5.3
		8.4	10.2
		21.1	53.6
		9.2	16.5
		21	11.7
		11.9	29
		4.3	9.7
		8.7	15.8
		24.7	3.2
		7.1	63.3
		28.9	8.6
		11.5	34.3
		2.2	10.9
		21	13.2
		0.9	3
		0.8	13.1
		0.6	26.3
		1.6	25.3
		0.9	19.7
		0.8	2.2
		0.7	14.6
		1	22.7
		1	8.9
		2	12.2
		1	9.3
		1.3	44.7
		2.3	18.7
		0.9	19.6
		11.6	3
		1.9	8.3
		1	8
		16.7	4.4
		7.1	4.6
		12.2	11.3
		25	2.7
		12.4	17.4
		6.2	9.9
		3	2.1
		2.8	19.4
		3	14.4
		2.9	6.3
		3.2	17.8
		3	26.5
		19.7	26.1
		2.1	2.1
		8.8	17.3
		2.8	23.9
		2	21.6
		6.2	9.6
		1.4	24.4
		4.9	15.7
		1.5	2.9
		3.8	13
		4.6	19.7
		3	14.2
		7.3	9.1
		2.6	15.2
		3.2	4.8
		2.5	8.3
		2.5	3.3
		2.1	6.3
		17.1	16.1
		19.9	4.7
		3.1	12.8
		2.1	23.5
		2.4	7.8
		19.6	4.1
		13	5.3
		8.9	5.9
		4.7	6.6
		8.4	3.4
		3.2	8.2
		9.2	15.1
		21.6	2.2
		18.4	8.6
		7.2	1.4
		11.8	52.3
		12.2	2
		3	2
		3.3	4.7
		8.3	9.9
		19.3	0.9
		14.9	2.1
		6.2	1.1
		8.4	1
		31.2	1
		4.5	1
		6	2
		0.9	0.9
		2.2	1.3
		1	17.8
		1	1.9
		1	37.3
		2	2
		1.2	1.1
		0.8	13.9
		1.4	3.1
		0.9	5.3
		1	6.5
		2.2	3.7
		1.8	2.7
		1	27.3
		0.9	5.6
		1.1	30.9
		2.5	7.4
		0.2	2.9
		1	6.1
		15.5
		1.1
		0.9
		1.4
		0.8
		1.8
		1.1
		6.1
		2.4
		15.9
		19.7
		33.2
		15.1
		1.1
		5.2
		31.1
		2.5
		2.6
		1.7
		13.4
		5.1
		12.3
		7.6
		1.3
		34.1
		3.3
		1
		7.1
		12.8
		4.2
		1.8
		0.7
		18
		1.9
		23.2
		2.5
		10.2
		1.7
		1.1
		0.7
		17.9
		14.8
		15.2
		17.2
		10.3
		4.7
		20.9
		2.5
		2.5
		11.4
		15.7
		7.1
		7
		11.3
		2.3
		8.3
		1.7
		3.1
		12.1
		11.5
		2.9
		9.7
		1
		2
		3.1
		0.9
		1
		1.6
		3.7

## Sheet: Fig6B
		Presence of actin filaments [%]
		RH	act1KO
			24h	48h	72h	96h
Replica1	CS1	100	66	27	13	2
	CS2	100	44	17	11	2
	CS3	100	56	30	11	6
Replica2	CS1	100	60	36	6	0
	CS2	100	66	31	24	2
	CS3	100	60	38	6	4
Replica3	CS1	100	60	46	6	0
	CS2	100	70	26	8	0
	CS3	100	56	25	3	0
		Presence of actin filaments [%]
		RH	act1KO
			24h	48h	72h	96h
Total results	Replica1	100	55.3	24.6	11.6	3.3
	Replica2	100	62	35	12	2
	Replica3	100	62	32.3	5.7	0
	Average	100	59.7667	30.6333	9.76667	1.76667
	StDEv	0	3.86825	5.3966	3.52751	1.66233
